# Supplementary material
Source: PubMed Central journal article supplement (PMC3094954)
Supplement: supp_85_11_5415__1.pdf [file supp_85_11_5415__1.pdf]

**A**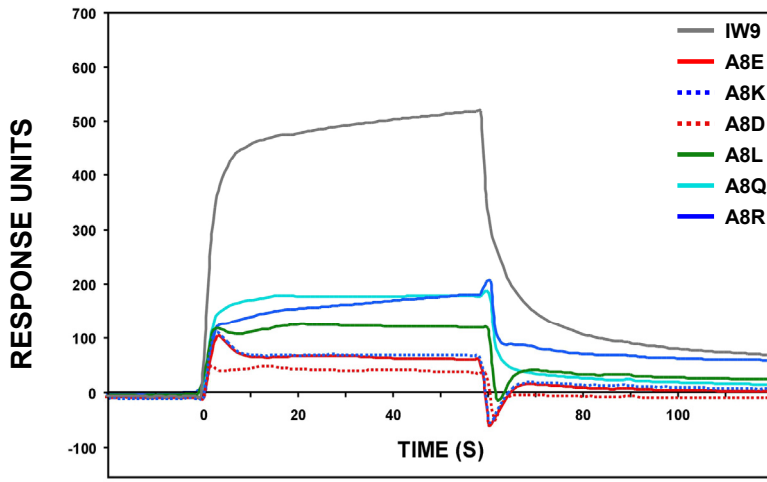**B**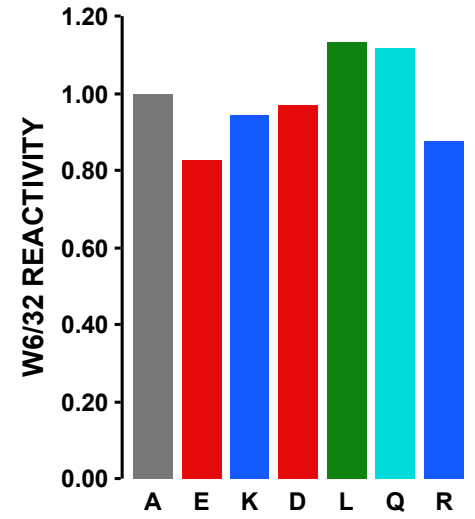**C**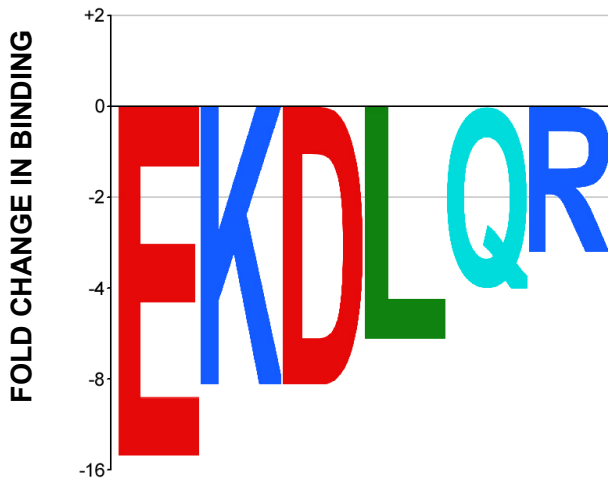

**Supplementary Data 1. Representative SPR binding sensograms demonstrating ligand-dependent binding of KIR3DL1 to HLA-B\*5703 in complex with C-1 TW10 and IW9 variants.**

(A) Biotinylated B\*5703- $\beta$ 2m complexes were immobilised (2,000 to 2,500 RU) on SA-sensor chips, over which a fixed concentration of soluble KIR3DL1 was injected at a constant flow rate. (B) The proportion of immobilised HLA material corresponding correctly folded protein was assessed by saturation binding of the conformation-sensitive antibody W6/32. The amount of correctly folded protein was set to an arbitrary level of 1 for the HLA-B5703 complex containing the wildtype IW9 peptide (A at position C-1). (C) Normalising the binding shown in panel A to the amount of W6/32-reactive material (rather than the total amount of immobilised HLA protein, as shown in Figure 5C for these peptide variants) confirmed that the reduced binding seen for these variants represents differences in KIR3DL1 binding, and does not arise from differences in the efficiency with which the peptides rescue HLA-B5703 in the UV exchange reaction.
